# Supplementary material for: pH-Controlled photocatalytic abatement of RhB by an FeWO4/BiPO4 p–n heterojunction under visible light irradiation
Source: Royal Society of Chemistry journal article supplement (doi:10.1039/c9nj04263f), 2019-01-01
Supplement: c9nj04263f1.pdf [file c9nj04263f1.pdf]

## Supporting Information

### **pH Controlled Photocatalytic Abatement of RhB by FeWO<sub>4</sub>/BiPO<sub>4</sub> p-n Heterojunction**

#### **Under Visible Light Irradiation**

Nithya Mahendran, Sathya Udayakumar, Keerthi Praveen\*

\*Department of Chemistry, CEG campus, Anna University, Chennai-600025, India

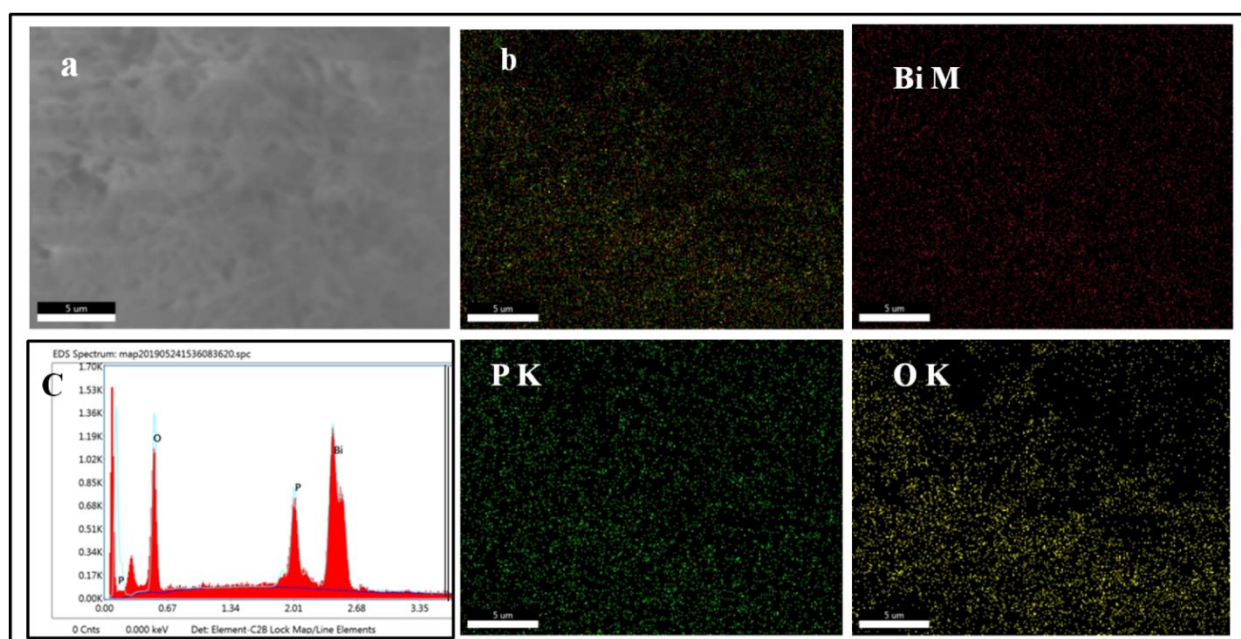

**Figure S1.** EDAX spectrum and corresponding elemental mapping of pure BiPO<sub>4</sub>

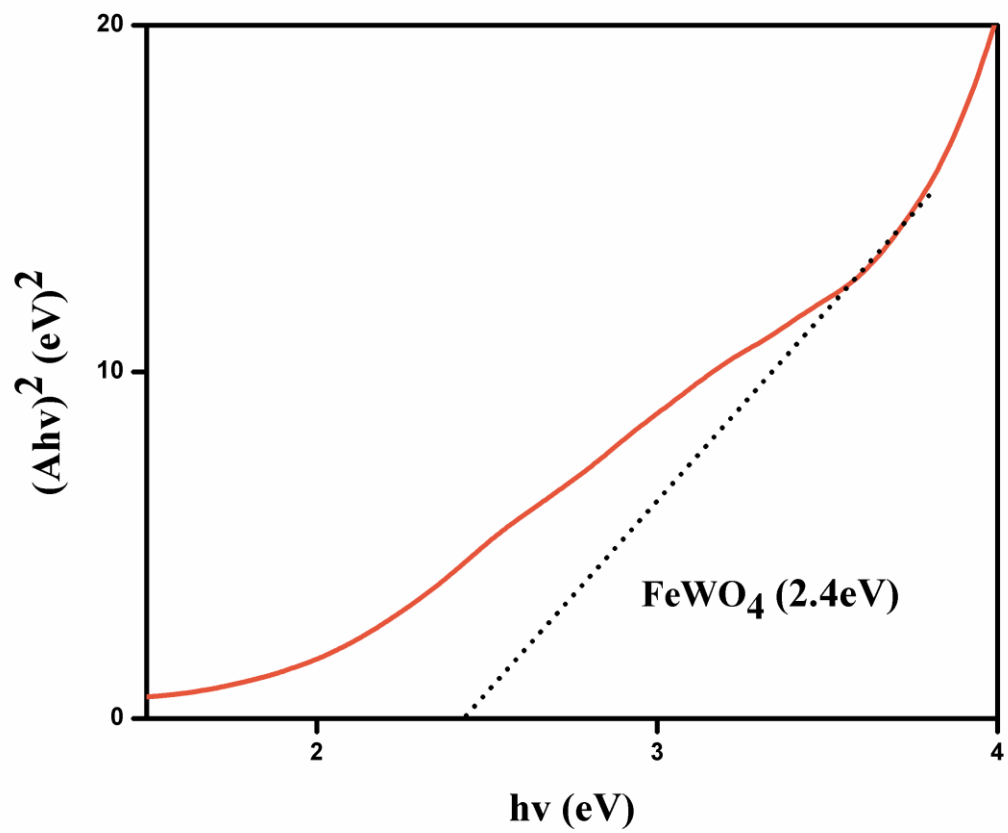

**Figure S2.** Tauc plot of pure FeWO<sub>4</sub>

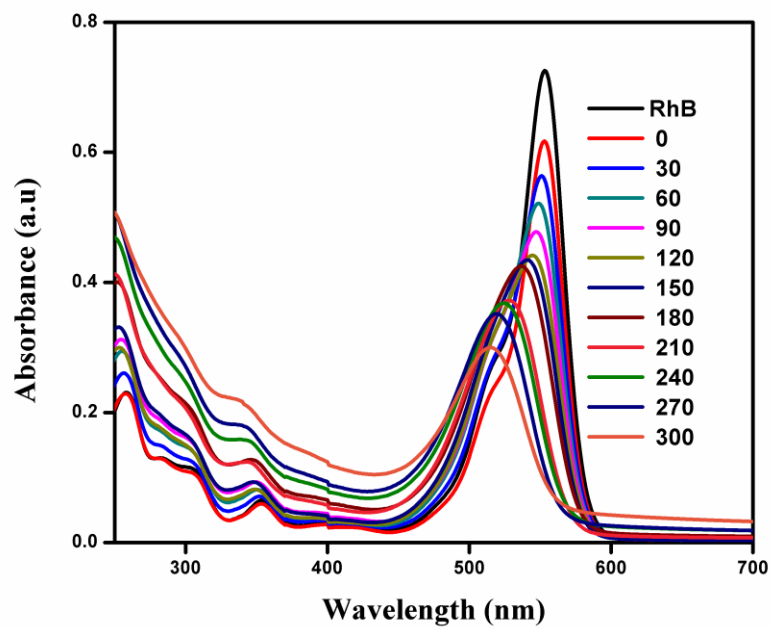

**Figure S3.** Absorption spectra of RhB during photocatalytic reaction of S3 at neutral condition

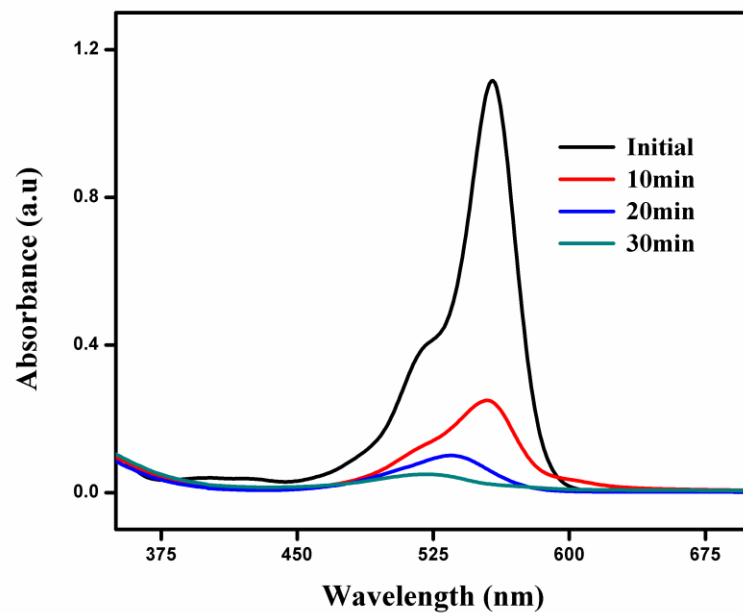

**Figure S4.** Absorption spectra of RhB during photocatalytic reaction of S3 at pH3 without adsorption

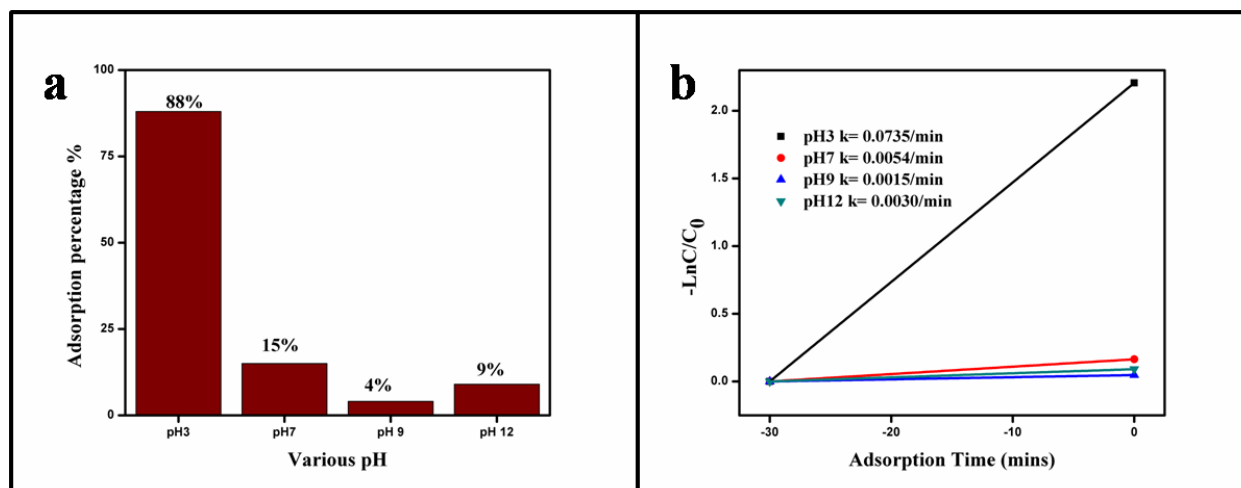

**Figure S5.** (a) The percentage adsorption and (b) adsorption kinetics of RhB on the composite S3 at various pH condition

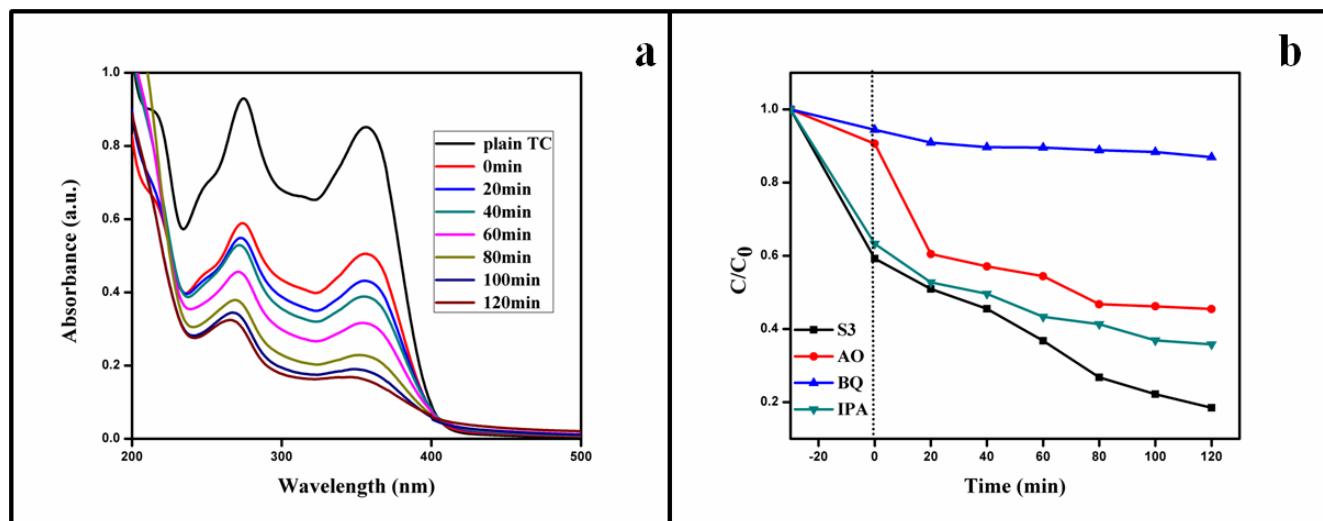

**Figure S6.** (a) Absorption spectra of TC during photocatalytic reaction using S3 (b) Effects of scavenging agents on TC degradation

Table S1. The calculated rate constants for synthesized catalyst toward the photodegradation of RhB and various pH conditions for S3 sample.

| Photocatalyst     | Rate constants (min <sup>-1</sup> ) |
|-------------------|-------------------------------------|
| BiPO <sub>4</sub> | 0.0013                              |
| S1                | 0.0024                              |
| S2                | 0.0039                              |
| S3                | 0.0063                              |
| S4                | 0.0046                              |
| pH3 S3            | 0.1800                              |
| pH7 S3            | 0.0105                              |
| pH9 S3            | 0.0070                              |
| pH12 S3           | 0.0089                              |
